# Supplementary material for: How to suppress undesired synchronization
Source: PubMed Central journal article supplement — Sci Rep. 2012 Sep 17;2:658. doi: 10.1038/srep00658 (PMC3443817; doi:10.1038/srep00658), 2012-09-17
Supplement: srep00658-s1.pdf [file srep00658-s1.pdf]

# How to suppress undesired synchronization

## Supplementary Information

V. H. P. Louzada<sup>1</sup>, N. A. M. Araújo<sup>1</sup>, J. S. Andrade<sup>2</sup>, Jr., H. J. Herrmann<sup>1,2</sup>.

<sup>1</sup>*Computational Physics for Engineering Materials, IfB,  
ETH Zurich, Schafmattstrasse 6, CH-8093 Zurich, Switzerland*

<sup>2</sup>*Departamento de Física, Universidade Federal do Ceará, 60451-970 Fortaleza, Ceará, Brazil*

### SUPPLEMENTARY TABLE

| Network           | Nodes | Average Degree | Max Degree |
|-------------------|-------|----------------|------------|
| The Internet      | 40028 | 2.36           | 259        |
| <i>C. elegans</i> | 283   | 17.39          | 115        |

TABLE S1. Number of nodes, average degree, and maximum degree for network of Routers in the Internet and the neural network of the *C. elegans*.

### SUPPLEMENTARY FIGURES

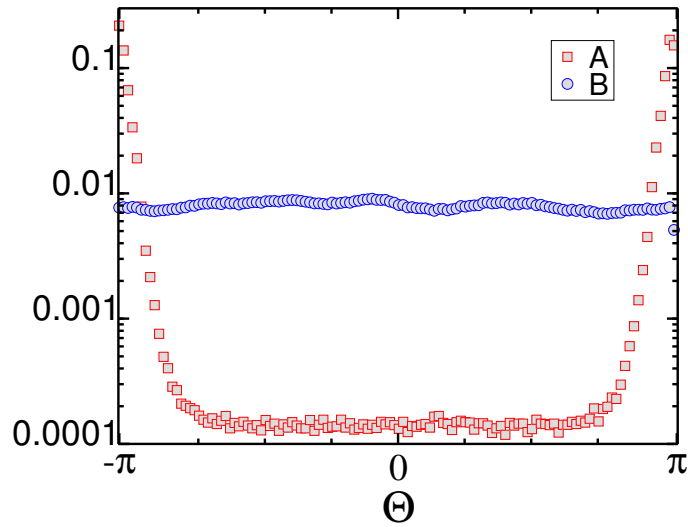

FIG. S1. **Distribution of oscillator phases.** Histogram of the phase of oscillators for  $t = 100$ . Curves represent oscillators according to the mean-field (A) and pairwise (B) models. While mean-field contrarians are frozen in  $-\pi$  and  $\pi$ , pairwise contrarians are uniformly distributed through all phases. Results are averages over 1000 ER networks of 1000 oscillators each, where  $\rho = 0.1$  and  $\lambda = 1.0$ .

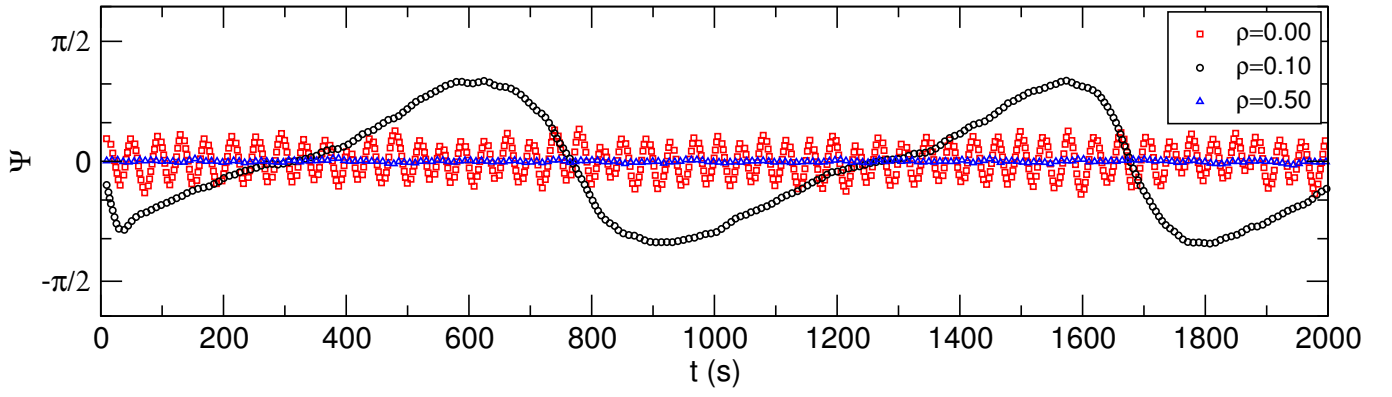

FIG. S2. **Average phase of oscillators with different fractions of pairwise  $\rho$  contrarians.** Time dependence of the average phase of oscillators for different fractions of randomly assigned contrarians. The amplitude of the wave goes to zero with the fraction contrarians oscillators.

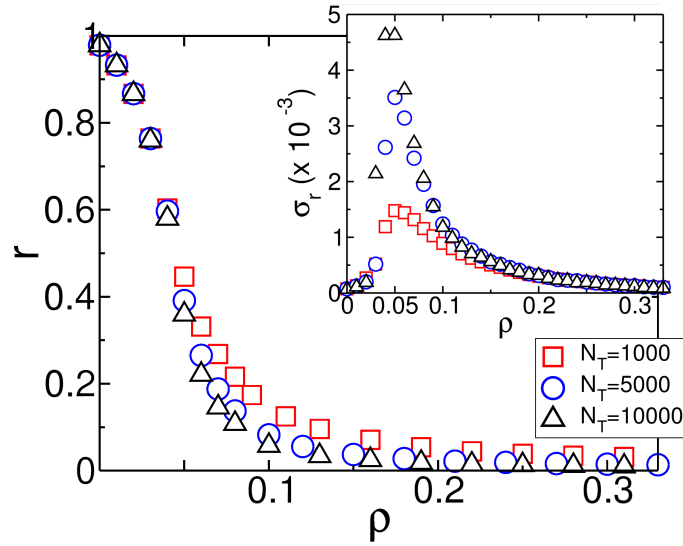

FIG. S3. **Impact of pairwise contrarians assigned to the nodes of highest degrees on the synchronization of ER networks of average degree four.** Order parameter  $r$  dependence on the fraction of contrarians  $\rho$  for different network sizes showing a suppression of synchronization after the introduction of pairwise contrarians. The inset is the standard-deviation of  $r$  showing a transition around  $\rho = 0.05$ , much smaller than randomly assigned contrarians.

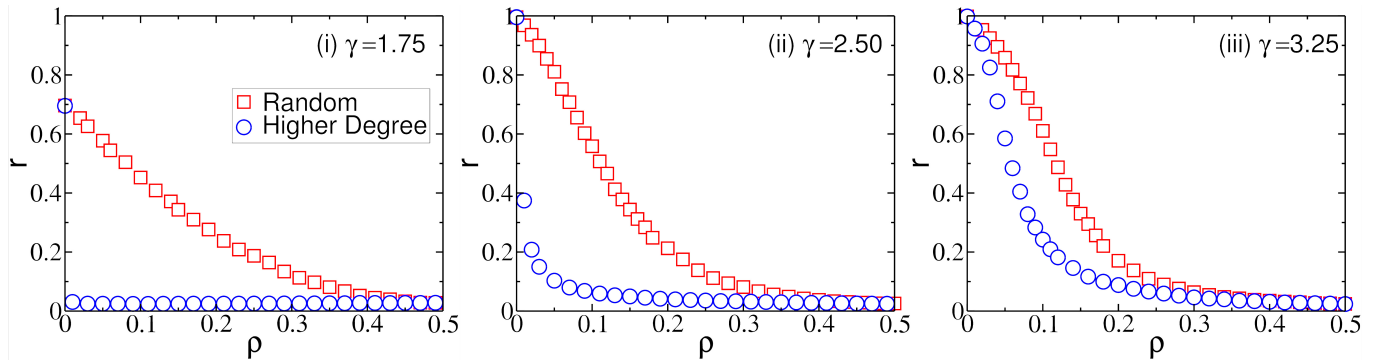

FIG. S4. **Scale-free networks with contrarians.** Fraction of pairwise contrarian oscillators assigned randomly and based on their degree to scale-free networks of different degree exponent  $\gamma$ , namely, 1.75, 2.5, and 3.25.
